# Activation of G proteins by guanine nucleotide exchange factors relies on GTPase activity

Rob J Stanley<sup>1,2</sup> and Geraint MH Thomas<sup>1,2,\*</sup>

<sup>1</sup>CoMPLEX, University College London

<sup>2</sup>Dept. of Cell & Developmental Biology, University College London

\*g.thomas@ucl.ac.uk

## 1 **Abstract**

2 G proteins are an important family of signalling molecules controlled by gua-  
3 nine nucleotide exchange and GTPase activity in what is commonly called an  
4 'activation/inactivation cycle'. The molecular mechanism by which guanine nu-  
5 cleotide exchange factors (GEFs) catalyse the activation of monomeric G pro-  
6 teins is well-established, however the complete reversibility of this mechanism  
7 is often overlooked. Here, we use a theoretical approach to prove that GEFs are  
8 unable to positively control G protein systems at steady-state in the absence of  
9 GTPase activity. Instead, positive regulation of G proteins must be seen as a  
10 product of the competition between guanine nucleotide exchange and GTPase  
11 activity – emphasising a central role for GTPase activity beyond merely signal  
12 termination. We conclude that a more accurate description of the regulation  
13 of G proteins via these processes is as a 'balance/imbalance' mechanism. This  
14 result has implications for the understanding of many intracellular signalling  
15 processes, and for experimental strategies that rely on modulating G protein  
16 systems.

## 17 **Introduction**

18 G proteins are an important and universal family of intracellular signalling mol-  
19 ecules, incorporating both the alpha subunits of heterotrimeric G proteins and  
20 the Ras small monomeric G proteins. Most G proteins bind guanine nucleotides  
21 (GDP, GTP) in a strongly conserved nucleotide binding pocket – an ancient

22 mechanism preserved in both eukaryotes and prokaryotes (Simon et al. 1991;  
23 Dong et al. 2007; Rojas et al. 2012). Typically, G proteins transition between two  
24 discrete conformations with distinct signalling functions depending on which  
25 nucleotide is bound, and so G proteins are often referred to as ‘molecular switches’.  
26 G protein regulatory systems are crucial components of many intracellular pro-  
27 cesses – incorrect regulation of G proteins has been implicated in disease: cancer  
28 (Young et al. 2009; Vigil et al. 2010; O’Hayre et al. 2013), cardiovascular disease  
29 (Loirand et al. 2013), genetic disorders (Seixas et al. 2013), among many others.  
30 Regulation of G protein activation is largely controlled by two mechanisms (Fig-  
31 ure 1A) and is commonly described as an ‘activation/inactivation cycle’ be-  
32 tween the GTP-bound ‘on/active’ state and the GDP-bound ‘off/inactive’ state  
33 (Vetter and Wittinghofer 2001; Oldham and Hamm 2008). Activation of G pro-  
34 teins is controlled by accessory proteins which catalyse guanine nucleotide ex-  
35 change – the sequential release of GDP and binding of GTP. For monomeric G  
36 proteins these are known as guanine nucleotide exchange factors (GEFs). For  
37 heterotrimeric G proteins, G protein coupled receptors (GPCRs) fulfil this role.  
38 Inactivation of G proteins is controlled by GTPase activity which may either be  
39 intrinsic, or be provided via accessory GTPase-activating proteins (GAPs). It  
40 is generally thought that GTPase activity is required for the termination of G  
41 protein signalling but that it is not essential for signal transmission (Takai et al.  
42 2001).

43 An often overlooked property of GEFs is that their catalytic mechanism is com-  
44 pletely reversible (Figure 1B) (Goody 2014). GEF-binding is not specific to GDP-  
45 bound G protein – GEFs can also bind to GTP-bound G protein and catalyse the  
46 reverse nucleotide exchange, GTP to GDP. In this way, GEFs are capable of inac-  
47 tivating G proteins (Bos et al. 2007). The extent to which the reversibility of this  
48 mechanism has been overlooked is demonstrated by the sheer number of publi-  
49 cation which include diagrams where arrows corresponding to GEF-mediated  
50 regulation are drawn as unidirectional – missing the reverse arrowhead high-  
51 lighted in Figure 1A. This error is perhaps best illustrated by its occurrence in  
52 core biology textbooks, for example:

- 53 • Figures 3–66 and 3–68 in Alberts et al. (2014)
- 54 • Figures 16–15 and 16–16 in Alberts et al. (2013)
- 55 • Figure 4, box 12–2 in Nelson and Cox (2013)
- 56 • Figure 13.40 in Berg et al. (2010)
- 57 • Figure 19–40 in Voet and Voet (2010)
- 58 • Figure 7.12A in Hancock (2010)

- 59 • Figure 10.3 and 10.4 in Bolsover et al. (2011)
- 60 • Figure 42.4 in Baynes and Dominiczak (2014)

61 There has been recent renewed interest in understanding the roles and functions  
62 of GEFs based on a proper consideration of their enzyme kinetics (Northup et  
63 al. 2012; Randazzo et al. 2013; Goody 2014). Here we develop the theoretical  
64 understanding of G protein regulation by GEFs and GTPase activity through  
65 exploring the consequences of the reversibility of the GEF mechanism. We use  
66 mathematical methods to investigate G protein regulatory systems independent  
67 of measured kinetic rates, in the context of the physiologically important steady-  
68 state dynamics. This allows us to comment and draw conclusions on the qual-  
69 itative behaviours of G protein:GEF:GTPase systems under a wide variety of  
70 conditions.

## 71 **Results**

### 72 **Qualitative differences between reversible and irreversible mechanisms**

73 To demonstrate the qualitative difference between a reversible and an irreversible  
74 mechanism we derived mass-action models of the GEF mechanism (Figure 1B,  
75 Methods) and an artificial irreversible mechanism generated by disallowing re-  
76 lease of GTP from the G protein·GEF complex.

77 The reversible and irreversible models were simulated: in the absence of GTPase  
78 activity (Figures 2A, 2D); with intrinsic GTPase activity, modelled by exponen-  
79 tial decay (Figures 2B, 2E); and with GAP-mediated GTPase activity, modelled  
80 using the Michaelis-Menten equation (Figures 2C, 2F). To ensure that simula-  
81 tions were physiologically plausible, kinetic rates measured for the the Ran:RCC1  
82 system were used (Klebe et al. 1995). A GTP:GDP ratio of 10:1 was used to em-  
83 ulate the relative levels in eukaryotic cells.

84 In the presence of either form of GTPase activity both reversible and irreversible  
85 mechanisms display similar behaviour which is consistent with observations of  
86 GEF-mediated activation of G proteins in a wide range of biological systems  
87 (Janetopoulos et al. 2001; Peyker et al. 2005; Adjobo-Hermans et al. 2011; Chang  
88 and Ross 2012; Oliveira and Yasuda 2013).

89 In the absence of GTPase activity we see a qualitative difference in the behaviour  
90 of the two mechanisms; each distinct from their shared behaviour in the pres-  
91 ence of GTPase activity. While both mechanisms show an inhibitory effect (which

92 will discussed below in more detail for the GEF mechanism), the steady-state  
93 concentrations of active and inactive G protein differ substantially. Through  
94 this example we demonstrate how the assumption of an irreversible model would  
95 lead to incorrect conclusions when considering extremal (i.e. diseased) states.

### 96 **GEFs act to attain a constant ratio of inactive to active G protein**

97 We derived a simplified quasi-steady-state model of the GEF mechanism (Fig-  
98 ure 1B) in an equivalent manner to the derivation of the Michaelis-Menten equa-  
99 tion (Michaelis and Menten 1913; Briggs and Haldane 1925; Johnson and Goody  
100 2011; Gunawardena 2012). This quasi-steady-state model captures the behaviour  
101 of a generic G protein regulatory system in a single equation:

$$\frac{d[G_{GTP}]}{dt} = \frac{k_{cat}([G_{GDP}] - \kappa[G_{GTP}])e_0}{K_0 + K_1[G_{GDP}] + K_2[G_{GTP}]} - f_{GTPase}$$

102 Here  $[G_{GXP}]$  is the concentration of GXP-bound G protein and  $\kappa$  is the ratio of the  
103 backwards to the forwards kinetic rates. (For definitions of the other parameters  
104 see the Methods section.)

105 At steady-state (setting the above equation equal to zero), in the absence of  
106 GTPase activity, we find that the ratio of inactive to active G protein must al-  
107 ways equal the value of the constant  $\kappa$ . An equivalent statement is: GEFs act  
108 to produce a constant proportion of active G protein. While the ratio of inac-  
109 tive to active G protein ( $\kappa$ ) and proportion of active G protein ( $1/\kappa + 1$ ) will vary  
110 for different G protein:GEF systems, these values will remain constant within a  
111 system, independent of the G protein or GEF concentrations.

### 112 **GEFs can be inhibitory**

113 The commonly used description of GEFs as ‘activators’ of G proteins is contra-  
114 dicted by the inhibitory effect seen when the GEF mechanism is simulated in  
115 the absence of GTPase activity (Figure 2D). This demonstrates the inadequacy  
116 of this description.

117 The inhibitory effect can be explained by an equivalent increase in the concentra-  
118 tions of intermediate G protein-GEF complexes. Values for the concentrations  
119 of these intermediate complexes were derived as part of the construction of the  
120 quasi-steady-state model. Using these values, we obtained an equation for the  
121 proportion of (free) active G protein in terms of the total concentration of GEF.

122 This equation is plotted with the rates described for the Ran:RCC1 system in Fig-  
123 ure 3A. Using this equation we are able to prove that in the absence of GTPase  
124 activity the concentration of active G protein is inversely related to the total con-  
125 centration of GEF. As the concentration of GEF increases, the concentration of  
126 G protein will always decrease, and vice-versa.

127 Note that a high concentration of GEF will also lead to a faster total catalytic rate  
128 (a larger  $V_{max}$ ). This suggests that there will be a tradeoff in terms of increasing  
129 the concentration of GEF: a low concentration of GEF means that there will be  
130 little inhibition, but a slow total rate; a high concentration of GEF will lead to  
131 inhibition, but a fast total rate. We therefore hypothesise that for a healthy G  
132 protein system, the concentration of GEF will lie in a physiologically relevant  
133 region, where the inhibitory effect is not so pronounced, but where there is still  
134 sufficient GEF to catalyse nucleotide exchange at an appropriate rate.

### 135 **GTPase activity has a functional role in the observed activation of G proteins**

136 The simulations of the GEF mechanism show that GTPase activity is sufficient  
137 to restore an apparent GEF-mediated activation (Figures 2E, 2F). By comparing  
138 these with the simulation of the system without GTPase activity (Figure 2D),  
139 we can see how this activation arises. Initially, due to the GTPase activity, the  
140 activation state reached by the system is suppressed – it is much reduced from  
141 the activation state reached in the absence of GTPase activity. An increase in the  
142 concentration of GEF is then able to positively regulate the system by moving  
143 the activation state closer to the activation state reached in the absence of GTPase  
144 activity (even though this state may itself be reduced).

145 For intrinsic GTPase activity we obtained an equation which describes the effect  
146 of the relative rates of GEF-catalysed nucleotide exchange and GTPase activity  
147 on the proportion of G protein which is active. This equation is plotted with  
148 example parameters in Figure 3B, where we see a sigmoidal response such that  
149 increasing the concentration of GEF (relative to the GTPase activity) increases  
150 the concentration of active G protein. Again this allows us to hypothesise that,  
151 for a healthy G protein system, the relative rates of nucleotide exchange and  
152 GTPase activity must lie in this sigmoidal region, in order for the system to  
153 properly respond to an activating or inhibitory signal.

154 Together, this clearly demonstrates a requirement for GTPase activity for the  
155 observable activation of G proteins by GEFs. The proposed mechanism of reg-  
156 ulation for a generic G protein:GEF:GTPase system can be summarised as fol-

157 lows: 1. GTPase activity inactivates the G protein system by altering the ratio  
158 of inactive to active G protein away from a GEF-mediated equilibrium. 2. If the  
159 rate of guanine nucleotide exchange increases or the GTPase activity decreases,  
160 the proportion of active G protein will then move towards the GEF-mediated  
161 equilibrium, generating an observed activation.

## 162 Discussion

163 We have shown that there are certain universal properties of GEF-mediated reg-  
164 ulation of G proteins that arise from the reversibility of its mechanism and which  
165 are independent of specific kinetic rates. The complete reversibility of the GEF  
166 mechanism means that at steady-state any GEF acts to produce a constant ratio  
167 of inactive to active G protein – giving a theoretical maximum proportion of ac-  
168 tive G protein. Once this maximum is attained, then any subsequent increase  
169 in the concentration of GEF—the ‘activator’ of the system—cannot increase the  
170 concentration of active G protein. Instead this will lead to inhibition caused by  
171 creation of excess intermediate G protein·GEF complexes.

172 We urge caution against naïve description of GEFs as ‘enzymes that activate G  
173 proteins’ and against representations that show this mechanism as irreversible  
174 as we have shown how these shorthands distort our understanding of the un-  
175 derlying biology. We have demonstrated that GEFs should not be described as  
176 enzymes that convert a substrate into product, but as enzymes that act to attain  
177 an equilibrium—a balance—of active and inactive G protein. The two key roles  
178 of GTPase activity are then: to drive the system away from this equilibrium—to  
179 create an imbalance—and so permit positive regulation by GEFs; and to confer  
180 a unique directionality on the G protein regulatory ‘cycle’. Therefore we sug-  
181 gest that G protein signalling controlled by GEFs and GTPase activity should  
182 not be described as an ‘activation/inactivation’ cycle but rather as a system that  
183 is controlled through ‘regulated balance/imbalance’.

184 Both the complete reversibility of guanine nucleotide exchange and associated  
185 requirement for GTPase activity as a functional component in the activation of G  
186 proteins has previously been under-appreciated. This may be due to the almost  
187 exclusive use of experimental systems where the GDP form of the G protein  
188 is the unique starting condition and where uptake of GTP is monitored as the  
189 GEF assay. We also note that our simulations show that an artificial irreversible  
190 mechanism (Figures 2B, C) and reversible GEF mechanism (Figures 2E, F) have  
191 similar profiles in the presence of GTPase activity and so under many conditions  
192 it may be difficult to experimentally distinguish these mechanisms.

193 We predict that experimental protocols which attempt to regulate G proteins by  
194 the over-expression of a GEF are likely to produce unexpected behaviour. We  
195 expect that in many cases this may cause inhibition of the G protein rather than  
196 activation (Figure 3A). Activation of G proteins should therefore be preferen-  
197 tially targeted by reduction of the relevant GTPase activity (Figure 3B). Note  
198 that these results remain consistent with the long-established use of dominant  
199 negative mutants for the inhibition of G protein systems (Feig 1999; Barren and  
200 Artemyev 2007). We accept that many previous studies that have ignored the  
201 reversibility of GEFs will have made conclusions that are valid under many con-  
202 ditions. But we stress that in extremal scenarios (such as in disease) those con-  
203 clusions may not always hold.

204 Additionally, we hope that this new perspective in considering the control of  
205 G proteins will lead to novel approaches for the control of G protein systems.  
206 GEFs have previously been suggested as potential therapeutic targets (Bos et al.  
207 2007). Our results extend this to a novel, and seemingly paradoxical, mecha-  
208 nism by which over-expression of an activator could lead to the inhibition of  
209 its substrate. This may have implications in G protein systems with diminished  
210 GTPase activity, for example constitutively active transforming mutations in  
211 Ras common in cancers (Stephen et al. 2014), where additional GAP activity  
212 would have no effect but where sequestration of active G protein by a GEF may  
213 be useful alternative.

214 The mathematical underpinning to our results mean that they should hold for  
215 any G proteins:GEF system so long as the mechanism is consistent with that  
216 studied here (Figure 1A), and under the reasonable assumption that the ma-  
217 jority of its functional signalling is due to the steady-state behaviour. The pre-  
218 cise tradeoffs for any system (equilibrium ratios, total rates, and scale of inhi-  
219 bition) will depend on the specific kinetic rates for the GEF and the strength of  
220 GTPase activity, but the overall qualitative characteristics should remain consis-  
221 tent across all such systems. Conclusions based on alternative mechanisms, for  
222 instance systems with an implicit G protein-GEF-GAP complex (Berstein et al.  
223 1992), would require further analysis.

## 224 **Methods**

225 The following mathematical analysis uses the notation:

- 226 • G protein without nucleotide bound  $\rightarrow G$

- 227 • G protein with GDP bound  $\rightarrow G_{\text{GDP}}$
- 228 • G protein with GTP bound  $\rightarrow G_{\text{GTP}}$
- 229 • GEF  $\rightarrow E$

230 The volume concentration of a species  $S$  will be denoted by  $[S]$ .

### 231 Mass-action model

232 A deterministic ordinary differential equation (ODE) model of the GEF mecha-  
233 nism (Figure 1B) was derived using the law of mass-action:

$$\begin{aligned} \frac{d[E]}{dt} &= - [E](k_1[G_{\text{GDP}}] + k_5[G_{\text{GTP}}]) + k_2[E \cdot G_{\text{GDP}}] + k_6[E \cdot G_{\text{GTP}}] \\ \frac{d[E \cdot G_{\text{GDP}}]}{dt} &= - (k_2 + k_3)[E \cdot G_{\text{GDP}}] + k_1[G_{\text{GDP}}][E] + k_4[E \cdot G][\text{GDP}] \\ \frac{d[E \cdot G_{\text{GTP}}]}{dt} &= - (k_6 + k_7)[E \cdot G_{\text{GTP}}] + k_5[G_{\text{GTP}}][E] + k_8[E \cdot G][\text{GTP}] \\ \frac{d[E \cdot G]}{dt} &= - (k_4[\text{GDP}] + k_8[\text{GTP}])[E \cdot G] + k_3[E \cdot G_{\text{GDP}}] + k_7[E \cdot G_{\text{GTP}}] \\ \frac{d[G_{\text{GDP}}]}{dt} &= - k_1[E][G_{\text{GDP}}] + k_2[E \cdot G_{\text{GDP}}] + f_{\text{GTPase}} \\ \frac{d[G_{\text{GTP}}]}{dt} &= - k_5[E][G_{\text{GTP}}] + k_6[E \cdot G_{\text{GTP}}] - f_{\text{GTPase}} \end{aligned}$$

234 We assume: for systems with no GTPase activity,  $f_{\text{GTPase}} = 0$ ; for systems  
235 with intrinsic GTPase activity,  $f_{\text{GTPase}} = k_{\text{ase}}[G_{\text{GTP}}]$ ; and for systems with GAP-  
236 mediated GTPase activity,  $f_{\text{GTPase}} = \frac{k_{\text{ase}}[G_{\text{GTP}}]f_0}{K_m + [G_{\text{GTP}}]}$  where  $f_0$  is the total concentra-  
237 tion of GAP.

238 There is an equation for the conservation of mass of GEF:

$$e_0 = [E] + [E \cdot G_{\text{GDP}}] + [E \cdot G_{\text{GTP}}] + [E \cdot G] \quad (1)$$

239 And an equation for the conservation of mass of G protein:

$$g_0 = [G_{\text{GDP}}] + [G_{\text{GTP}}] + [E \cdot G_{\text{GDP}}] + [E \cdot G_{\text{GTP}}] + [E \cdot G] \quad (2)$$

### 240 Simulation of the mass-action model

241 The parameters used for the simulations in Figure 2 are summarised in Table  
242 S1. Wherever possible, parameters measured for the Ran:RCC1 system were



243 used (Klebe et al. 1995). The irreversible model was generated by setting  $k_7 = 0$ .  
244 (Alternative irreversible models could be generated by setting any one or more  
245 of the reverse reaction rates to zero.)

246 All simulations were started from steady-state and generated by numerical in-  
247 tegration of the mass-action equations, with the exception of free enzyme con-  
248 centration  $[E]$  which was calculated from the total mass of enzyme equation (1)  
249 with:

- 250 •  $e_0 = 0.05$  during  $0 \leq t < 2$
- 251 •  $e_0 = 0.2$  during  $2 \leq t < 4$
- 252 • and free GEF ( $E$ ) removed from the simulation until  $e_0 = 0.05$  during  $t \geq 4$

### 253 Quasi-steady-state model

254 Quasi-steady-state solutions for the intermediate enzyme complexes of the GEF  
255 mechanism (Figure 1B) were derived using the framework of Gunawardena  
256 (2012) (Figure S1):

$$\begin{aligned} [E] &= \left( \frac{K_0}{K_0 + K_1[G_{\text{GDP}}] + K_2[G_{\text{GTP}}]} \right) e_0 \\ [E \cdot G_{\text{GDP}}] &= \left( \frac{K_1^d[G_{\text{GDP}}] + K_2^d[G_{\text{GTP}}]}{K_0 + K_1[G_{\text{GDP}}] + K_2[G_{\text{GTP}}]} \right) e_0 \\ [E \cdot G_{\text{GTP}}] &= \left( \frac{K_1^t[G_{\text{GDP}}] + K_2^t[G_{\text{GTP}}]}{K_0 + K_1[G_{\text{GDP}}] + K_2[G_{\text{GTP}}]} \right) e_0 \\ [E \cdot G] &= \left( \frac{K_1^g[G_{\text{GDP}}] + K_2^g[G_{\text{GTP}}]}{K_0 + K_1[G_{\text{GDP}}] + K_2[G_{\text{GTP}}]} \right) e_0 \end{aligned}$$

257 where the  $K_i^x$  and the  $K_i$  are summary parameters (defined in Table S1).

258 These quasi-steady-state solutions were substituted into the equation for the  
259 rate of change of  $[G_{\text{GTP}}]$  given in the mass-action model, to obtain a quasi-steady-  
260 state model for a generic GEF acting on a generic G protein:

$$\frac{d[G_{\text{GTP}}]}{dt} = \frac{k_{\text{cat}}([G_{\text{GDP}}] - \kappa[G_{\text{GTP}}])e_0}{K_0 + K_1[G_{\text{GDP}}] + K_2[G_{\text{GTP}}]} - f_{\text{GTPase}} \quad (3)$$

261 where  $k_{\text{cat}}$  is the forward catalytic rate;  $\kappa$  is the ratio of the backwards to the  
262 forwards kinetic rates, multiplied by the ratio of GDP to GTP.

263 This equation does not consider mass held in G protein·GEF intermediate com-  
264 plexes and so is only a good approximation when  $e_0 \ll g_0$ . Note that with

265  $f_{\text{GTPase}} = 0$  this model reduces to the Michaelis-Menten equation when  $y = 0$ ,  
266 and is equivalent to the equation used by Randazzo et al. (2013) when the con-  
267 centration of GTP is absorbed into the summary paramters.

### 268 **Steady-state ratio of inactive to active G protein**

269 At steady-state with  $f_{\text{GTPase}} = 0$ , equation (3) implies:

$$[G_{\text{GDP}}] = \kappa [G_{\text{GTP}}] \quad (4)$$

270 Assuming that  $e_0 \ll g_0$ , equation (2) simplifies to  $g_0 = [G_{\text{GDP}}] + [G_{\text{GTP}}]$ , into  
271 which equation (4) can be substituted to obtain:

$$\frac{[G_{\text{GTP}}]}{g_0} = \frac{1}{\kappa + 1}$$

272 This is the maximum steady-state proportion of active G protein.

### 273 **Active G protein as a function of GEF concentration (without GTPase activity)**

274 The effect of increasing the concentration of GEF on the steady-state concen-  
275 tration of active G protein in the absence of GTPase activity ( $f_{\text{GTPase}} = 0$ ) was  
276 investigated.

277 The quasi-steady-state solutions for the intermediate enzyme complexes and  
278 equation (4) were substituted into equation (2) to obtain:

$$0 = (\kappa + 1)[G_{\text{GTP}}]^2 + 2b[G_{\text{GTP}}] - K_s g_0$$

279 where  $b = \frac{1}{2}(e_0 - g_0 + (\kappa + 1)K_s)$  and  $K_s = \frac{K_0}{(K_1\kappa + K_2)}$ .

280 This quadratic equation has one positive solution:

$$[G_{\text{GTP}}] = \frac{1}{\kappa + 1} \left( -b + \sqrt{b^2 + (\kappa + 1)K_s g_0} \right)$$

281 Alternatively, the proportion of active G protein is:

$$\frac{[G_{\text{GTP}}]}{g_0} = \frac{1}{g_0(\kappa + 1)} \left( -b + \sqrt{b^2 + (\kappa + 1)K_s g_0} \right) \quad (5)$$

282 We are interested in the rate of change of  $[G_{\text{GTP}}]$  with respect to  $e_0$ , the total  
 283 concentration of GEF. As  $b$  (and only  $b$ ) is a function of  $e_0$ , we can examine:

$$\frac{d[G_{\text{GTP}}]}{db} = \frac{1}{\kappa + 1} \left( \frac{b}{\sqrt{b^2 + (\kappa + 1)K_s g_0}} - 1 \right) < 0$$

284 As this equation is always negative, the concentration of active G protein must  
 285 decrease as the concentration of GEF is increased (and vice-versa).

### 286 **Active G protein as a function of GEF concentration (with GTPase activity)**

287 The effect of increasing the concentration of GEF on the steady-state concentra-  
 288 tion of active G protein with GTPase activity ( $f_{\text{GTPase}} = k_{\text{ase}}[G_{\text{GTP}}]$ ) was investi-  
 289 gated.

290 At steady-state  $\frac{d[G_{\text{GTP}}]}{dt} = 0$  implies:

$$[G_{\text{GDP}}] = \frac{K_2 y^2 + (K_0 + \kappa \hat{\kappa})[G_{\text{GTP}}]}{\hat{\kappa} - K_1 [G_{\text{GTP}}]} \quad (6)$$

291 where  $\hat{\kappa} = \frac{k_{\text{cat}} e_0}{k_{\text{ase}}}$ .

292 Again assuming that  $e_0 \ll g_0$ , equation (2) simplifies to  $g_0 = [G_{\text{GDP}}] + [G_{\text{GTP}}]$ ,  
 293 into which equation (6) can be substituted to obtain:

$$0 = (K_2 - K_1)[G_{\text{GTP}}]^2 + 2\hat{b}[G_{\text{GTP}}] - \hat{\kappa}g_0e_0$$

294 where  $\hat{b} = \frac{1}{2}(K_0 + K_1 g_0 + (\kappa + 1)\hat{\kappa}e_0)$ .

295 This quadratic equation has one solution that lies in the region  $0 \leq [G_{\text{GTP}}] \leq g_0$ :

$$[G_{\text{GTP}}] = \frac{1}{K_2 - K_1} \left( -\hat{b} + \sqrt{\hat{b}^2 + (K_2 - K_1)\hat{\kappa}g_0e_0} \right)$$

296 Alternatively, the proportion of active G protein is:

$$\frac{[G_{\text{GTP}}]}{g_0} = \frac{1}{g_0(K_2 - K_1)} \left( -\hat{b} + \sqrt{\hat{b}^2 + (K_2 - K_1)\hat{\kappa}g_0e_0} \right) \quad (7)$$

297 This equation describes the steady-state concentration of active G protein as a  
 298 function of  $\hat{\kappa}$ , the ratio of the rate of forwards GEF-mediate nucleotide exchange  
 299 to the rate of GTPase activity.

## 300 **Acknowledgements**

301 We would like to thank the members of the UCL CSSB lab including Janine  
302 Symonds and Chris Barnes, and also Tina Daviter for their critical reading of  
303 previous versions of the manuscript. We would like to thank Kevin Bryson for  
304 his support. Funding for this study was provided by the British Heart Founda-  
305 tion.

## 306 **Author contributions**

307 This work formed part of the doctoral research of RS under the supervision of  
308 GT. RS produced mathematical results, and GT and RS wrote the paper.

## 309 **Conflict of interest**

310 The authors declare that they have no conflict of interest.

## 311 **References**

- 312 Adjobo-Hermans, M. J. W., Goedhart, J., van Weeren, L., Nijmeijer, S., Manders,  
313 E. M. M., Offermanns, S., and Gadella, T. W. J. (2011). "Real-time visualiza-  
314 tion of heterotrimeric G protein Gq activation in living cells." *BMC Biol.* 32.  
315 DOI: 10.1186/1741-7007-9-32.
- 316 Alberts, B., Bray, D., Hopkin, K., Johnson, A., Lewis, J., Raff, M., Roberts, K., and  
317 Walter, P. (2013). *Essential Cell Biology*. 4th ed. Taylor & Francis Group. ISBN:  
318 9781317806271.
- 319 Alberts, B., Johnson, A., Lewis, J., Morgan, D., Raff, M., Roberts, K., and Walter,  
320 P. (2014). *Molecular Biology of the Cell*. 6th ed. Taylor & Francis Group. ISBN:  
321 9781317563754.
- 322 Barren, B. and Artemyev, N. O. (2007). "Mechanisms of dominant negative G-  
323 protein alpha subunits." *J Neurosci Res* **85**, 3505–3514. DOI: 10.1002/jnr.  
324 21414.
- 325 Baynes, J. and Dominiczak, M. (2014). *Medical Biochemistry*. 4th ed. Elsevier Health  
326 Sciences UK. ISBN: 9781455745814.
- 327 Berg, J., Tymoczko, J., and Stryer, L. (2010). *Biochemistry*. 7th ed. W. H. Freeman.  
328 ISBN: 9781429229364.

- 329 Berstein, G., Blank, J. L., Jhon, D.-Y., Exton, J. H., Rhee, S. G., and Ross, E. M.  
330 (1992). "Phospholipase C- $\beta$ 1 is a GTPase-activating protein for Gq/11, its  
331 physiologic regulator." *Cell* **70**, 411–418. DOI: 10.1016/0092-8674(92)90165-  
332 9.
- 333 Bolsover, S., Shephard, E., White, H., and Hyams, J. (2011). *Cell Biology: A Short*  
334 *Course*. 3rd ed. Wiley. ISBN: 9781118008744.
- 335 Bos, J. L., Rehmann, H., and Wittinghofer, A. (2007). "GEFs and GAPs: critical  
336 elements in the control of small G proteins." *Cell* **129**, 865–877. DOI: 10.1016/  
337 j.cell.2007.05.018.
- 338 Briggs, G. E. and Haldane, J. B. (1925). "A Note on the Kinetics of Enzyme Ac-  
339 tion." *Biochem J* **19**, 338–339.
- 340 Chang, S. and Ross, E. M. (2012). "Activation biosensor for G protein-coupled re-  
341 ceptors: a FRET-based m1 muscarinic activation sensor that regulates G(q)." *PLoS One* **7**, e45651. DOI: 10.1371/journal.pone.0045651.
- 342
- 343 Dong, J.-H., Wen, J.-F., and Tian, H.-F. (2007). "Homologs of eukaryotic Ras su-  
344 perfamily proteins in prokaryotes and their novel phylogenetic correlation  
345 with their eukaryotic analogs". *Gene* **396**, 116–124. DOI: 10.1016/j.gene.2007.  
346 03.001.
- 347 Feig, L. A. (1999). "Tools of the trade: use of dominant-inhibitory mutants of  
348 Ras-family GTPases." *Nat Cell Biol* **1**, E25–E27. DOI: 10.1038/10018.
- 349 Goody, R. S. (2014). "How not to do kinetics: examples involving GTPases and  
350 guanine nucleotide exchange factors." *FEBS J* **281**, 593–600. DOI: 10.1111/  
351 febs.12551.
- 352 Gunawardena, J. (2012). "A linear framework for time-scale separation in non-  
353 linear biochemical systems." *PLoS One* **7**, e36321. DOI: 10.1371/journal.pone.  
354 0036321.
- 355 Hancock, J. (2010). *Cell Signalling*. 3rd ed. OUP Oxford. ISBN: 9780199232109.
- 356 Janetopoulos, C., Jin, T., and Devreotes, P. (2001). "Receptor-mediated activa-  
357 tion of heterotrimeric G-proteins in living cells." *Science* **291**, 2408–2411. DOI:  
358 10.1126/science.1055835.
- 359 Johnson, K. A. and Goody, R. S. (2011). "The original Michaelis constant: Trans-  
360 lation of the 1913 Michaelis-Menten Paper." *Biochemistry* **50**, 8264–8269. DOI:  
361 10.1021/bi201284u.
- 362 Klebe, C., Prinz, H., Wittinghofer, A., and Goody, R. S. (1995). "The kinetic  
363 mechanism of Ran–nucleotide exchange catalyzed by RCC1." *Biochemistry*  
364 **34**, 12543–12552. DOI: 10.1021/bi00039a008.

- 365 Loirand, G., Sauzeau, V., and Pacaud, P. (2013). "Small G proteins in the car-  
366 diovascular system: physiological and pathological aspects." *Physiol Rev* **93**,  
367 1659–1720. DOI: 10.1152/physrev.00021.2012.
- 368 Michaelis, L. and Menten, M. L. (1913). "Die kinetik der invertinwirkung." *Biochem*  
369 *Z* **49**, 333–369.
- 370 Nelson, D. and Cox, M. (2013). *Lehninger Principles of Biochemistry*. 6th ed. W. H.  
371 Freeman. W.H. Freeman. ISBN: 9781464109621.
- 372 Northup, J. K., Jian, X., and Randazzo, P. A. (2012). "Nucleotide exchange fac-  
373 tors: Kinetic analyses and the rationale for studying kinetics of GEFs." *Cell*  
374 *Logist* **2**, 140–146. DOI: 10.4161/cl.21627.
- 375 O'Hayre, M., Vázquez-Prado, J., Kufareva, I., Stawiski, E. W., Handel, T. M.,  
376 Seshagiri, S., and Gutkind, J. S. (2013). "The emerging mutational landscape  
377 of G proteins and G-protein-coupled receptors in cancer." *Nat Rev Cancer* **13**,  
378 412–424. DOI: 10.1038/nrc3521.
- 379 Oldham, W. M. and Hamm, H. E. (2008). "Heterotrimeric G protein activation by  
380 G-protein-coupled receptors." *Nat Rev Mol Cell Biol* **9**, 60–71. DOI: 10.1038/  
381 nrm2299.
- 382 Oliveira, A. F. and Yasuda, R. (2013). "An improved Ras sensor for highly sen-  
383 sitive and quantitative FRET-FLIM imaging." *PLoS One* **8**, e52874. DOI: 10.  
384 1371/journal.pone.0052874.
- 385 Peyker, A., Rocks, O., and Bastiaens, P. I. H. (2005). "Imaging activation of two  
386 Ras isoforms simultaneously in a single cell." *Chembiochem* **6**, 78–85. DOI:  
387 10.1002/cbic.200400280.
- 388 Randazzo, P. A., Jian, X., Chen, P.-W., Zhai, P., Soubias, O., and Northup, J. K.  
389 (2013). "Quantitative analysis of guanine nucleotide exchange factors (GEFs)  
390 as enzymes." *Cell Logist* **3**, e27609. DOI: 10.4161/cl.27609.
- 391 Rojas, A. M., Fuentes, G., Rausell, A., and Valencia, A. (2012). "The Ras protein  
392 superfamily: evolutionary tree and role of conserved amino acids." *J Cell Biol*  
393 **196**, 189–201.
- 394 Seixas, E., Barros, M., Seabra, M. C., and Barral, D. C. (2013). "Rab and Arf pro-  
395 teins in genetic diseases." *Traffic* **14**, 871–885. DOI: 10.1111/tra.12072.
- 396 Simon, M. I., Strathmann, M. P., and Gautam, N. (1991). "Diversity of G proteins  
397 in signal transduction." *Science* **252**, 802–808.
- 398 Stephen, A. G., Esposito, D., Bagni, R. K., and McCormick, F. (2014). "Dragging  
399 Ras back in the ring." *Cancer cell* **25**, 272–281. DOI: 10.1016/j.ccr.2014.02.017.
- 400 Takai, Y., Sasaki, T., and Matozaki, T. (2001). "Small GTP-binding proteins."  
401 *Physiol Rev* **81**, 153–208.

- 402 Vetter, I. R. and Wittinghofer, A. (2001). "The guanine nucleotide-binding switch  
403 in three dimensions." *Science* **294**, 1299–1304. DOI: 10.1126/science.1062023.
- 404 Vigil, D., Cherfils, J., Rossman, K. L., and Der, C. J. (2010). "Ras superfamily  
405 GEFs and GAPs: validated and tractable targets for cancer therapy?." *Nat*  
406 *Rev Cancer* **10**, 842–857. DOI: 10.1038/nrc2960.
- 407 Voet, D. and Voet, J. (2010). *Biochemistry*. 4th ed. John Wiley & Sons. ISBN: 9781118139936.
- 408 Young, A., Lyons, J., Miller, A. L., Phan, V. T., Alarcón, I. R., and McCormick,  
409 F. (2009). "Ras signaling and therapies." *Adv Cancer Res* **102**, 1–17. DOI: 10.  
410 1016/S0065-230X(09)02001-6.

## 411 **Figure captions**

412 **Figure 1. The activation of G proteins is regulated by GEFs and GTPase**  
413 **activity.**

414 **A** G proteins are controlled by GEFs which catalyse the sequential release and  
415 binding of guanine nucleotides, and by GTPase activity (both intrinsic and GAP-  
416 mediated) which hydrolyses the bound GTP to form GDP. The red circle high-  
417 lights that the GEF mechanism is completely reversible.

418 **B** The reversible mechanism by which a GEF catalyses guanine nucleotide ex-  
419 change on a G protein proceeds through a series of GEF·G protein complexes  
420 (Bos et al. 2007). Parameters  $k_i$  are kinetic rates which are unique to each G  
421 protein:GEF system. Associated species (free GEF, GTP, GDP) have not been  
422 drawn. The grey arrow identifies forwards nucleotide exchange, catalysing the  
423 activation of the G protein. The red arrow identifies reverse nucleotide exchange,  
424 catalysing the inactivation of the G protein.

425 **Figure 2. Apparent activation of G proteins via GEFs is only observed**  
426 **when GTPase activity is present.**

427 Simulation of mass-action models, using parameters described in Table S1, and  
428 where  $G_{GXP}$  denotes GXP-bound G protein. Where indicated as present, intrinsic  
429 GTPase activity was modelled as exponential decay, GAP-mediated GTPase  
430 activity by the Michaelis-Menten equation. The shaded region denotes stim-  
431 ulation of the system through increasing the active GEF 4-fold from its basal  
432 concentration. For all simulations, steady-state concentrations were used as the  
433 initial conditions. Mass corresponding to GEF·G protein complexes has not been  
434 drawn.

435 **A, B, C** An artificial irreversible model, constructed by assuming the rate of re-  
436 lease of GTP from the active G protein·GEF complex is zero.

437 **D, E, F** The reversible GEF mechanism (Figure 1B).

438 **Figure 3. GTPase activity restores the ability of GEFs to positively reg-**  
439 **ulate a G protein by moving the system away from equilibrium.**

440 The relationship between the concentration of GEF and the steady-state propor-  
441 tion of active G protein (equation (5), equation (7)) illustrated using parameters  
442 described for the Ran:RCC1 system (Klebe et al. 1995) and unit concentration



443 of G protein. The activation cannot be increased above a theoretical maximum  
444 equilibrium value derived from the ratio of the total forwards and backwards  
445 catalytic rates of the GEF ( $\kappa$ ). The shaded region denotes the region which is  
446 most likely to be physiologically relevant.

447 **A** In the absence of GTPase activity (equation (5)), increasing the GEF concentra-  
448 tion can only decrease the steady-state concentration of active G protein, instead  
449 producing irrelevant GEF·G protein complexes.

450 **B** In the presence of GTPase activity (equation (7)), the steady-state concentra-  
451 tion of active G protein is suppressed. Increasing the (relative) concentration of  
452 GEF acts to counter this suppression, driving the activation state back towards  
453 the maximum equilibrium value.

454 **Figure S1. Application of the framework of Gunawardena (2012) to**  
455 **the mechanism for the GEF mediated release and binding of guanine**  
456 **nucleotides to G proteins.**

457 **A** The graph on the enzyme complexes with complexes as vertices and edges  
458 representing reactions labelled by rates and partner species.

459 **B** All possible directed spanning trees of the graph on the enzyme complexes.  
460 The red vertex denotes the root of each spanning tree.

461 **C** The basis element,  $\rho$ , generated from the each spanning trees: the sum over  
462 each root vertex, of the products of the labels of each spanning tree. Every  
463 steady-state of the original system  $X = ([E], [E \cdot G_{GDP}], [E \cdot G_{GTP}], [E \cdot G])^T$  is  
464 a solution to the equation  $X = \lambda \rho$  where  $\lambda$  is a constant. We manipulate this  
465 equation to obtain  $X_i = \frac{\rho_i}{\sum_i \rho_i} \times \sum_i X_i$ .

466 **Table S1.**

467 Concentrations, kinetic parameters, and summary parameters used for Figures  
468 2 and 3. Where applicable, the definitions of the summary parameters in terms  
469 of the individual kinetic parameters are stated.

470 Value obtained from (Klebe et al. 1995).

## Figure 1

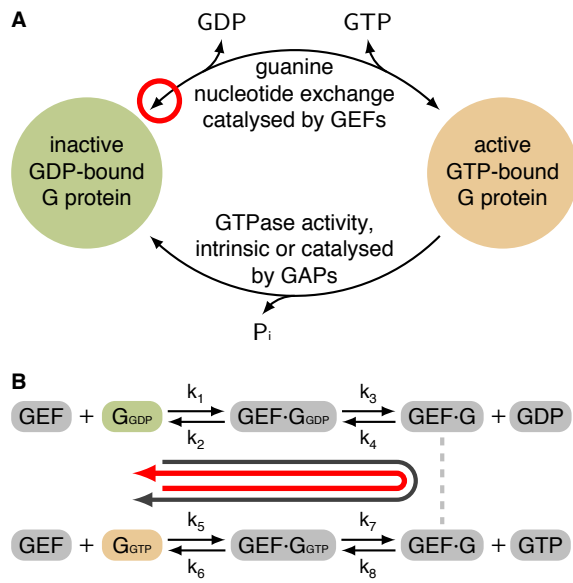

**Figure 2**

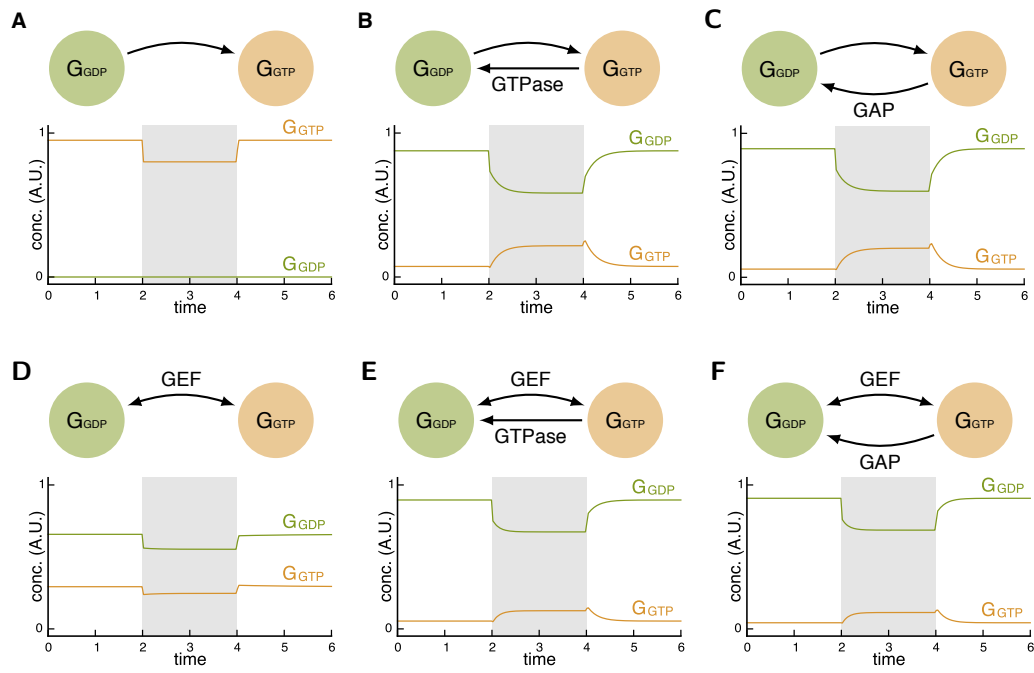

**Figure 3**

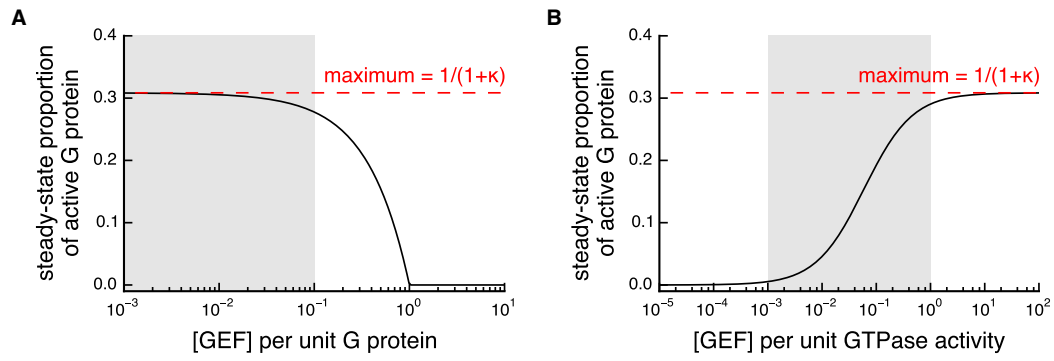

## Figure S1

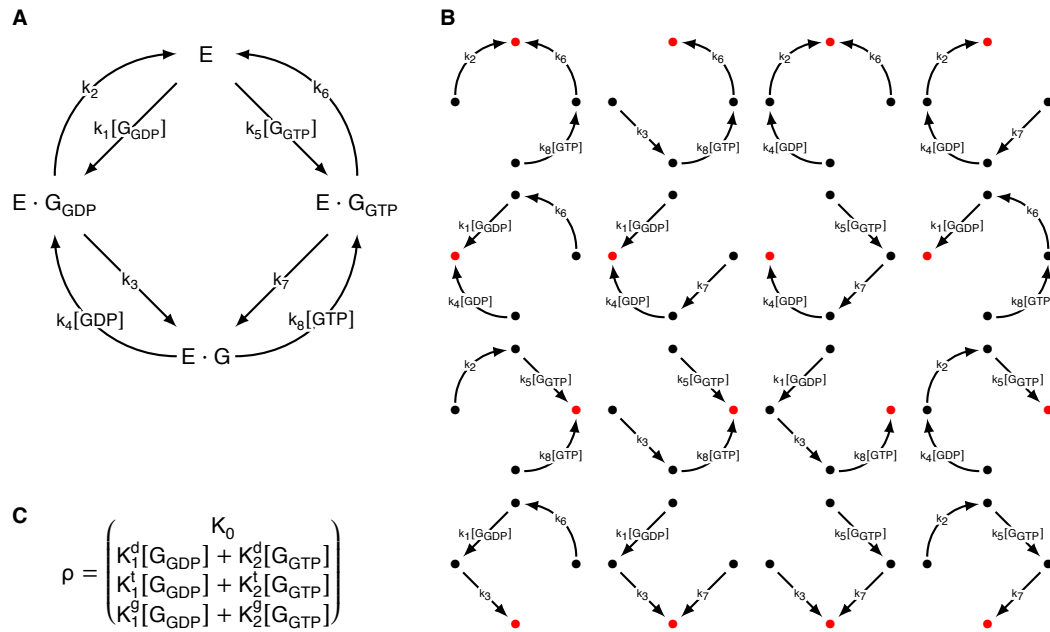

**Table S1**

| Rate             | Reversible model       | Irreversible model     | Definition                                                      |
|------------------|------------------------|------------------------|-----------------------------------------------------------------|
| $f_0$            | 1                      | 1                      |                                                                 |
| [GTP]            | 10                     | 10                     |                                                                 |
| [GDP]            | 1                      | 1                      |                                                                 |
| $k_1^*$          | $7.4 \times 10^7$      | $7.4 \times 10^7$      |                                                                 |
| $k_2^*$          | 55                     | 55                     |                                                                 |
| $k_3^*$          | 21                     | 21                     |                                                                 |
| $k_4^*$          | $1.1 \times 10^7$      | $1.1 \times 10^7$      |                                                                 |
| $k_5^*$          | $1.0 \times 10^8$      | $1.0 \times 10^8$      |                                                                 |
| $k_6^*$          | 55                     | 55                     |                                                                 |
| $k_7^*$          | 19                     | 0                      |                                                                 |
| $k_8^*$          | $0.6 \times 10^6$      | $0.6 \times 10^6$      |                                                                 |
| k_ase            | 4                      | 4                      |                                                                 |
| K_m              | 0.7                    | 0.7                    |                                                                 |
| K_ic             | 100                    | 100                    |                                                                 |
| $K_1^d$          | $8.466 \times 10^{16}$ | $6.919 \times 10^{16}$ | $k_1(k_6k_8[\text{GTP}] + k_4(k_6 + k_7)[\text{GDP}])$          |
| $K_2^d$          | $2.090 \times 10^{16}$ | 0                      | $k_4k_5k_7[\text{GDP}]$                                         |
| $K_1^g$          | $1.150 \times 10^{11}$ | $8.547 \times 10^{10}$ | $k_1k_3(k_6 + k_7)$                                             |
| $K_2^g$          | $1.444 \times 10^{11}$ | 0                      | $k_5k_7(k_2 + k_3)$                                             |
| $K_1^t$          | $9.324 \times 10^{15}$ | $9.324 \times 10^{15}$ | $k_1k_3k_8[\text{GTP}]$                                         |
| $K_2^t$          | $1.061 \times 10^{17}$ | $1.061 \times 10^{17}$ | $k_5(k_8(k_2 + k_3)[\text{GTP}] + k_2k_4[\text{GDP}])$          |
| $K_0$            | $6.985 \times 10^{10}$ | $5.836 \times 10^{10}$ | $k_6k_8(k_2 + k_3)[\text{GTP}] + k_2k_4(k_6 + k_7)[\text{GDP}]$ |
| $K_1$            | $9.398 \times 10^{16}$ | $7.851 \times 10^{16}$ | $K_1^d + K_1^g + K_1^t$                                         |
| $K_2$            | $1.270 \times 10^{17}$ | $1.061 \times 10^{17}$ | $K_2^d + K_2^g + K_2^t$                                         |
| $k_{\text{cat}}$ | $5.128 \times 10^{17}$ | $5.128 \times 10^{17}$ | $k_1k_3k_6k_8[\text{GTP}]$                                      |
| $\kappa$         | 2.242                  | 0                      | $\frac{k_2k_4k_5k_7[\text{GDP}]}{k_1k_3k_6k_8[\text{GTP}]}$     |
| $K_s$            | $2.069 \times 10^7$    | $5.500 \times 10^{-7}$ | $\frac{K_0}{(K_1\kappa + K_2)}$                                 |
